# Supplementary material for: Preparation of Biphenyl-Conjugated Bromotyrosine for Inhibition of PD-1/PD-L1 Immune Checkpoint Interactions
Source: Int J Mol Sci. 2020 May 21;21(10):3639. doi: 10.3390/ijms21103639 (PMC7279355; doi:10.3390/ijms21103639)
Supplement: Supplementary file 1 [file ijms-21-03639-s001.pdf]

# Preparation of Biphenyl-Conjugated Bromotyrosine for Inhibition of PD-1/PD-L1 Immune Checkpoint Interactions

Eun-Hye Kim <sup>1,2</sup>, Masuki Kawamoto <sup>1,3,\*</sup>, Roopa Dharmatti <sup>1</sup>, Eiry Kobatake <sup>2</sup>, Yoshihiro Ito <sup>1,3</sup> and Hideyuki Miyatake <sup>1,\*</sup>

<sup>1</sup> Nano Medical Engineering Laboratory, RIKEN Cluster of Pioneering Research, 2-1 Hirosawa, Wako, Saitama 351-0198, Japan.

<sup>2</sup> Department of Life Science and Technology, School of Life Science and Technology, Tokyo Institute of Technology, 4259 Nagatsuta-cho, Midori-ku, Yokohama 226-8503, Japan.

<sup>3</sup> Emergent Bioengineering Materials Research Team, RIKEN Center for Emergent Matter Science, 2-1 Hirosawa, Wako, Saitama 351-0198, Japan.

\* Correspondence: mkawamot@riken.jp; Tel.: +81-48-467-2752, Fax: +81-48-467-9300 (M.K.) or miyatake@riken.jp; Tel.: +81-48-467-4979, Fax: +81-48-467-9300 (H.M.)

Analytical data  
<sup>1</sup>H NMR spectra

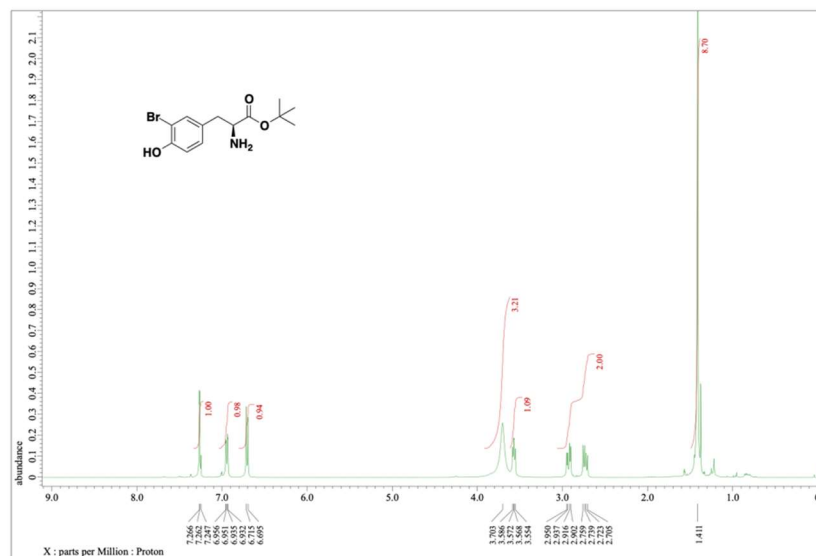

Figure S1. <sup>1</sup>H NMR spectrum of 3 in CDCl<sub>3</sub>.

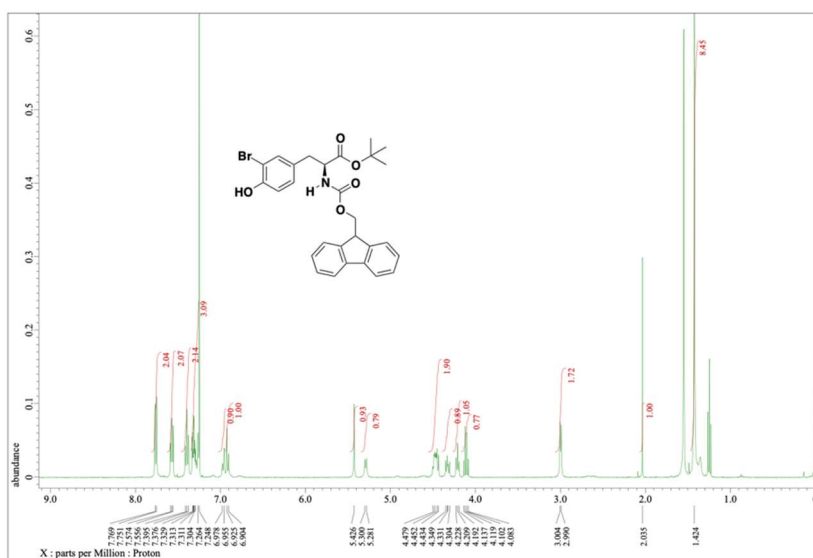

Figure S2. <sup>1</sup>H NMR spectrum of 4 in CDCl<sub>3</sub>.

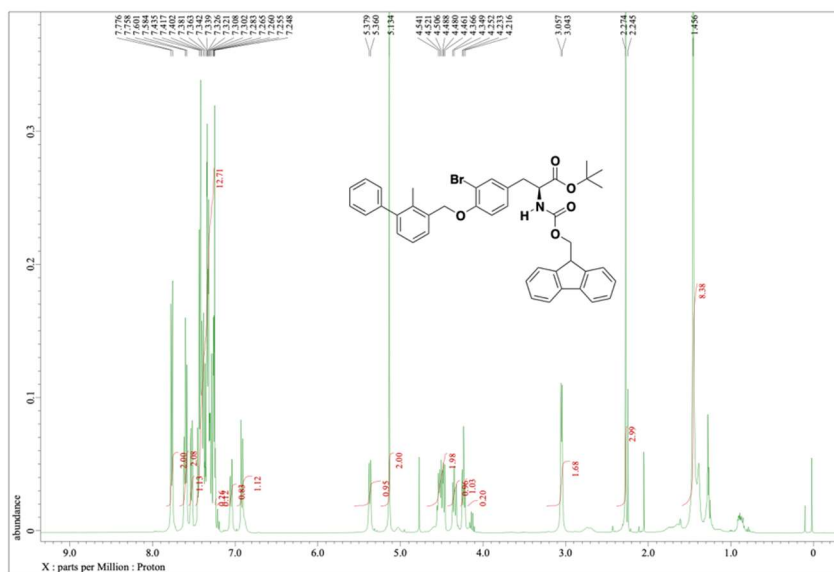

**Figure S3.**  $^1\text{H}$  NMR spectrum of **5** in  $\text{CDCl}_3$ .

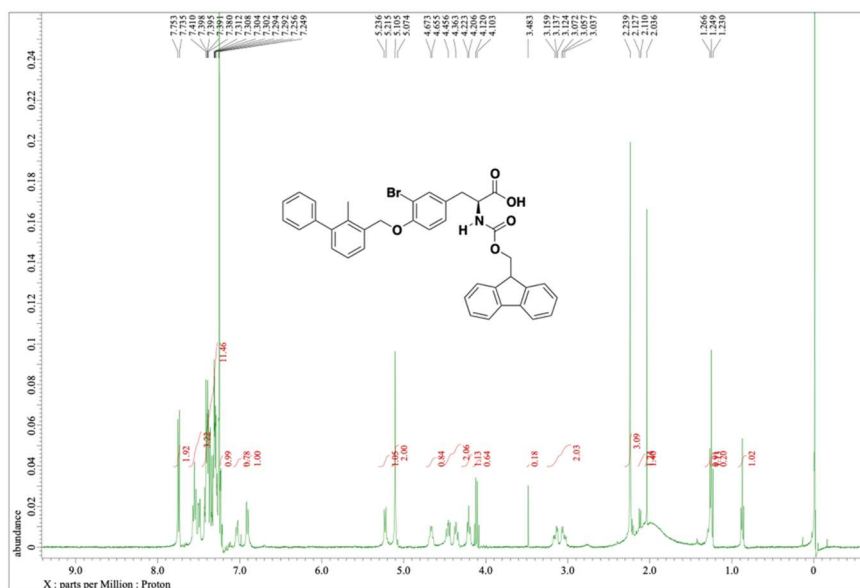

**Figure S4.**  $^1\text{H}$  NMR spectrum of **6** in  $\text{CDCl}_3$ .

**Table S1.** Summary of molecular weights and HPLC elution times for the synthesized compounds.

| Sequence | <sup>a</sup> [M +H] <sup>+</sup> | <sup>b</sup> <i>t</i> (min) | Sequence | <sup>a</sup> [M +H] <sup>+</sup> | <sup>b</sup> <i>t</i> (min) |
|----------|----------------------------------|-----------------------------|----------|----------------------------------|-----------------------------|
| X        | 440.1                            | 15.8                        | GXG      | 554.1                            | 13.0                        |
| GX       | 497.0                            | 14.6                        | XNL      | 667.2                            | 16.4                        |
| XG       | 497.1                            | 18.8                        | XNH      | 691.2                            | 14.9                        |
| XS       | 527.1                            | 16.0                        | XHP      | 674.2                            | 14.1                        |
| XR       | 586.1                            | 18.2                        | XGG      | 554.1                            | 16.4                        |
| XA       | 511.1                            | 19.0                        | XCSE     | 759.4                            | 15.1                        |
| XW       | 626.2                            | 15.5                        | XGGG     | 611.1                            | 19.3                        |
| YXC      | 706.2                            | 17.3                        | WRXNN    | 1010.3                           | 18.1                        |
| WXG      | 683.2                            | 19.1                        | ERXNK    | 967.3                            | 12.0                        |
| QXQ      | 696.2                            | 14.4                        | WRXNQ    | 1024.4                           | 13.4                        |
| NXR      | 710.2                            | 18.2                        | XRRRR    | 1064.5                           | 15.7                        |
| CXA      | 614.1                            | 14.9                        | XGGGG    | 668.2                            | 19.3                        |
| RXN      | 710.2                            | 11.7                        | XGGGGG   | 725.3                            | 18.4                        |
| SXR      | 683.2                            | 18.4                        | CERXNKM  | 1201.4                           | 15.6                        |
| CXR      | 699.2                            | 14.8                        | FWRXNNI  | 1270.5                           | 19.3                        |

<sup>a</sup>Determined by MALDI-TOF MS. Matrix: 2,5-dihydroxybenzoic acid.

<sup>b</sup>Estimated by HPLC using an InertSustain C18 column and 35–65% acetonitrile containing 1% trifluoroacetic acid as the eluant. Letters represent the single letter amino acid code.

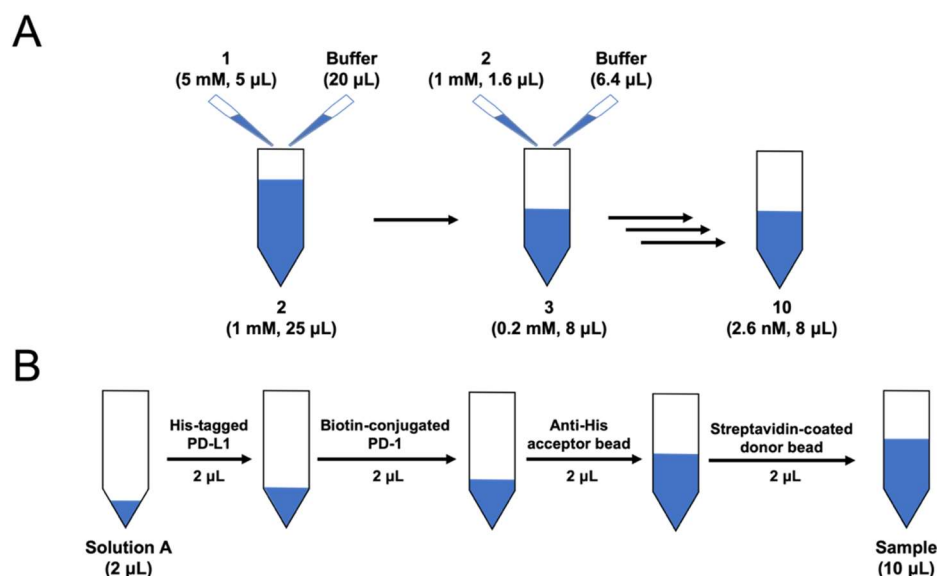

**Figure S5.** Preparation of (A) sample dilutions and (B) reaction samples.

**Table S2.** Concentrations of inhibitors in stock solutions (A) and in the assay sample.

|            | 1      | 2      | 3      | 4      | 5      | 6       | 7       | 8     | 9      | 10     |
|------------|--------|--------|--------|--------|--------|---------|---------|-------|--------|--------|
| Solution A | 5.0 mM | 1.0 mM | 0.2 mM | 40 µM  | 8.0 µM | 1.6 µM  | 0.32 µM | 64 nM | 13 nM  | 2.6 nM |
| Sample     | 1.0 mM | 0.2 mM | 40 µM  | 8.0 µM | 1.6 µM | 0.32 µM | 64 nM   | 13 nM | 2.6 nM | 0.5 nM |

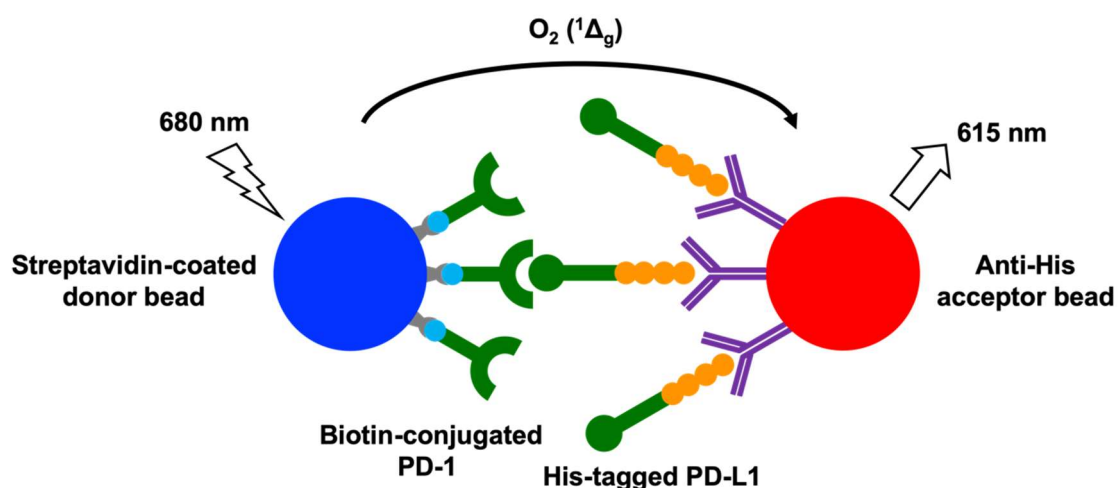

**Figure S6.** Principle of the Amplified Luminescence Proximity Homogeneous Assay (Alpha) assay for detection of PD-L1/PD-1 interactions through photoinduced energy transfer. Fluorescence intensity at 615 nm increases upon binding of PD-L1 to PD-1 and is reduced by competitive inhibition in the presence of **X** or **amino-X** compounds.
